# Supplementary material for: Rational design of two-dimensional flaky Fe/void/C composites for enhanced microwave absorption properties
Source: Royal Society of Chemistry journal article supplement (doi:10.1039/d2dt01065h), 2022-01-01
Supplement: d2dt01065h1.pdf [file d2dt01065h1.pdf]

Supplementary Information

## Rational Design of Two-dimensional Flaky Fe/void/C Composites for Enhanced Microwave Absorption Properties

*Runjing Mao, Susu Bao, Qingsong Li, Yusheng Yuan, Zhihao Liang, Meixi Zhang, Zhiyuan Jiang,\* and Zhaoxiong Xie*

State Key Laboratory of Physical Chemistry of Solid Surfaces, College of Chemistry and Chemical Engineering, Xiamen University, Xiamen, 361005, P. R. China.

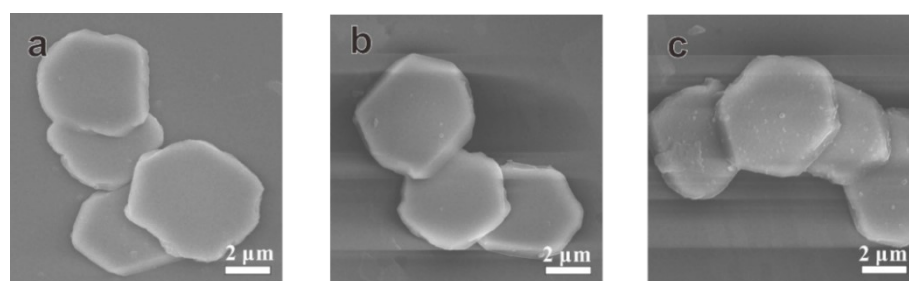

Fig. S1 SEM images of (a) Fe<sub>2</sub>O<sub>3</sub>@PDA-1, (b) Fe<sub>2</sub>O<sub>3</sub>@PDA-2, and (c) Fe<sub>2</sub>O<sub>3</sub>@PDA-3 Composites.

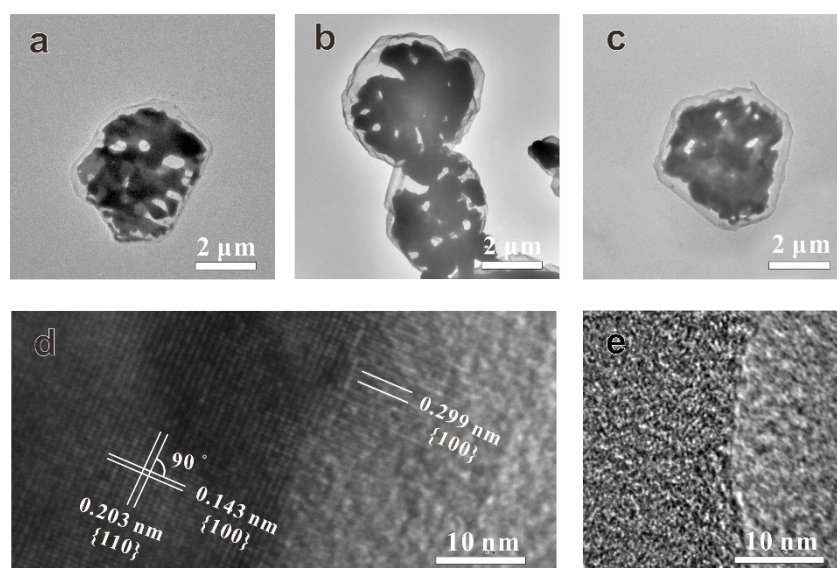

Fig. S2 TEM images of (a) Fe/void/C-1, (b) Fe/void/C-2, (c) Fe/void/C-3; HRTEM image of (d) metal cores and (e) amorphous carbon shell.

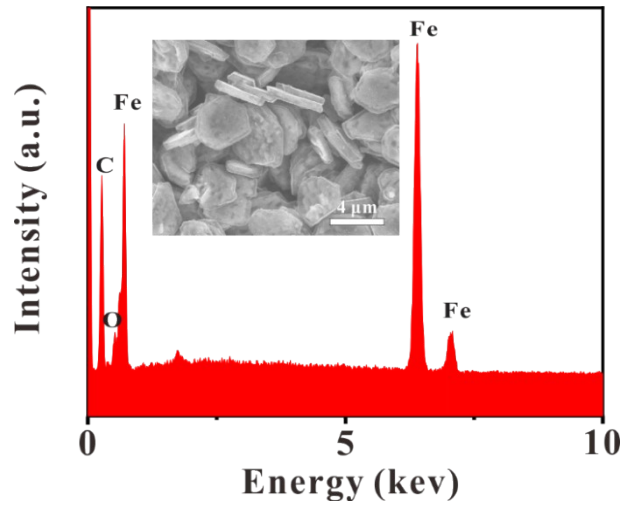

Fig. S3 Typical EDX spectrum of flaky Fe/void/C composites.

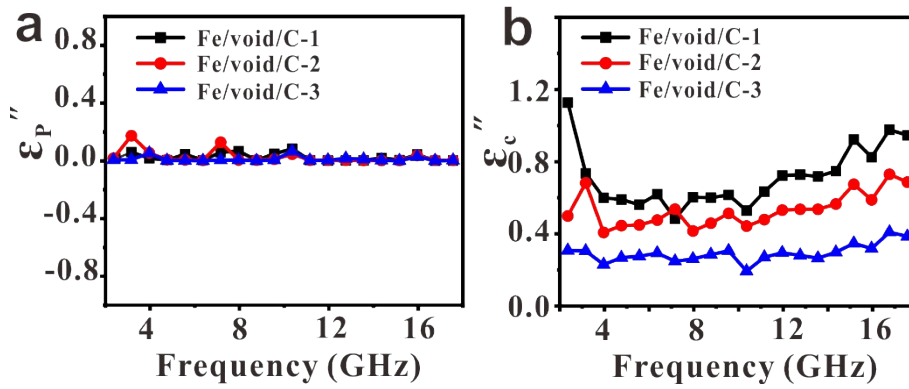

Fig. S4 Plots of  $\epsilon_c''$  and  $\epsilon_p''$  vs frequency of Fe/void/C composites.

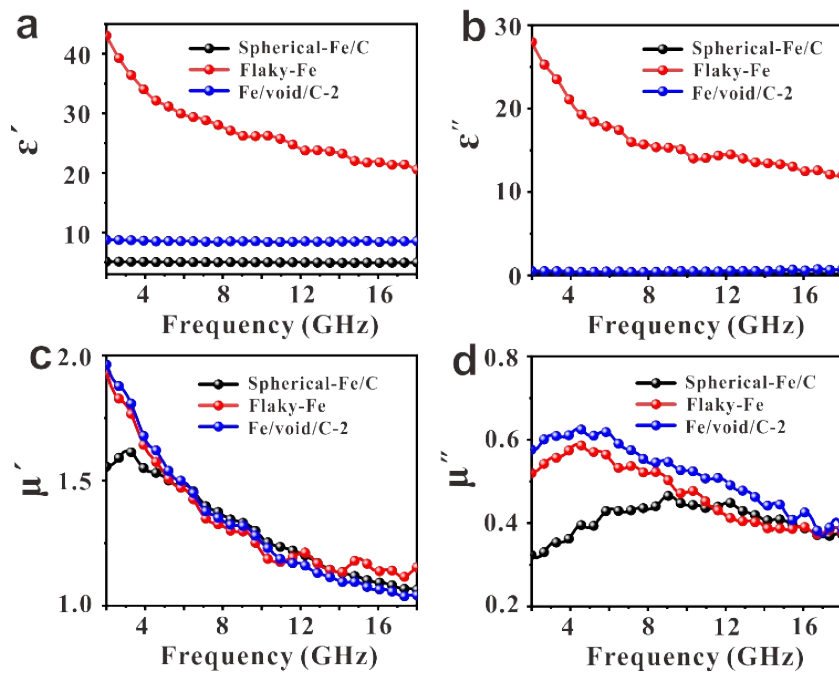

Fig. S5 (a, b) Relative complex permittivity of Flaky-Fe, Spherical Fe/C, Fe/void/C-2, respectively; (c, d) Relative complex permeability of Flaky-Fe, Spherical Fe/C, Fe/void/C-2, respectively.

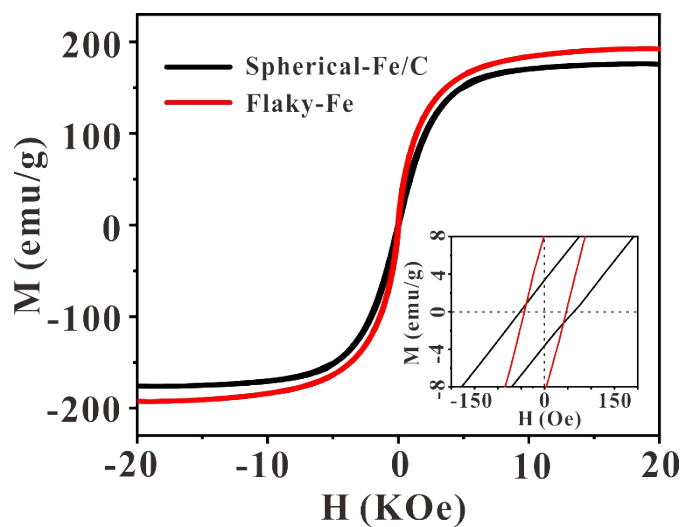

Fig. S6 Room-temperature magnetic hysteresis loops of Flaky-Fe and Spherical-Fe/C. Inset shows the corresponding part of hysteresis loops from -200 to 200 Oe.

Table S1. Carbon contents of different Fe/void/C composites and Spherical Fe/C measured by ICP-OES

| Samples        | The mass percent of carbon (wt %) | Calcination temperature (°C) |
|----------------|-----------------------------------|------------------------------|
| Fe/void/C-1    | 5.03                              | 550                          |
| Fe/void/C-2    | 8.47                              | 550                          |
| Fe/void/C-3    | 11.86                             | 550                          |
| Spherical Fe/C | 6.84                              | 550                          |
